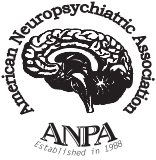

# American Neuropsychiatric Association

## ABOUT ANPA

The American Neuropsychiatric Association (ANPA), established in 1988, is an organization of professionals in neuropsychiatry and the clinical neurosciences. Our mission is to apply neuroscience for the benefit of people. We work together in a collegial fashion to advance knowledge of brain-behavior relations, provide a forum for learning, and promote excellent, scientific and compassionate care.

The strength of the organization is our diversity of membership, which is comprised of professionals in neuropsychiatry, behavioral neurology, neuropsychology, neuroradiology, neuropathology, and neurosurgery as well as the basic neurosciences, who share clinical and/or academic interests in neuropsychiatry. The interdisciplinary nature of the membership encourages collaborations among educators, clinicians, researchers, students and trainees in research presentations, symposia, workshops and/or continuing education courses. Students, fellows and other trainees are encouraged to participate and are offered discount membership and conference fees. The *Journal of Neuropsychiatry and Clinical Neurosciences (JNP)* is the official publication of the organization, and is a benefit of membership.

ANPA holds its annual scientific meeting in the early spring, and provides up to 30 CME / CE credits. Joint meetings with the International Neuropsychological Society, the British Neuropsychiatry Association, and the International Neuropsychiatry Congresses have added an international dimension to the ANPA conferences. Members are encouraged to submit their work for presentation at these annual meetings. Travel awards are available for promising young investigators. Annual meeting abstracts and proceedings are published in *JNP*.

In 1999 the designation of Fellow of the American Neuropsychiatric Association was established in recognition of special achievement in neuropsychiatry, behavioral neurology, neuropsychology or the clinical neurosciences.

In 2001 the ANPA Career Development Award Program was instituted. It recognizes advanced trainees in psychiatry, neurology, or neuropsychology whose accomplishments during training offer promise of a successful career in neuropsychiatry and the clinical neurosciences. The award will support costs associated with participation in two consecutive Annual Meetings, establish an informal mentoring relationship between the awardee and one ANPA Fellow and facilitate the awardee's involvement in ANPA.

ANPA has been actively engaged in efforts toward creation of subspecialty certification for neuropsychiatry including developing a core curriculum and guidelines for training in neuropsychiatry. In March 2004, a joint application from ANPA and the Society for Behavioral and Cognitive Neurology (SBCN) was submitted to the Unified Council for Neurologic Subspecialties (UCNS) for recognition of the Neurological Subspecialty Area (NSA) of Behavioral Neurology & Neuropsychiatry ([www.ucns.org](http://www.ucns.org)). On June 30, 2004 Behavioral Neurology & Neuropsychiatry was approved as a single subspecialty. The first certification exam in Behavioral Neurology & Neuropsychiatry took place in September 2006.

## BENEFITS OF MEMBERSHIP

- Subscription to the *Journal of Neuropsychiatry and Clinical Neurosciences (JNP)*
- Opportunities for presentation at the annual meeting with accepted abstracts published in the JNP
- Significantly reduced registration fees at the annual meeting
- Regular mailings including newsletters, information about job opportunities and pertinent information about upcoming meetings
- Discounted membership fees for trainees
- Collaboration in clinical, educational and research activities and the opportunity to interact with senior colleagues
- Extensive Bibliography in Neuropsychiatry
- Reduced journal subscription rates from related organizations
- Complimentary web site listings of job and training opportunities

## ANPA COMMITTEES

**The Education Committee** The ANPA Education Committee supports efforts related to education and practice of high quality care and research in neuropsychiatry. They have developed a model curriculum and standards for accreditation of neuropsychiatry fellowship programs. The committee has developed and maintains an updated bibliography of neuropsychiatry-relevant references.

**The Membership Committee** recruits new members for ANPA, reviews applications of all potential members, oversees collection of yearly membership dues, reviews Fellow applications and hosts a new member events at the annual ANPA meeting.

**The Research Committee** reviews and publishes articles on research issues in neuropsychiatry. They have developed a Research Registry that can be accessed through the ANPA website. Past projects include position statements on the clinician-scientist in neuropsychiatry, and topical reviews.

**The Scientific Program Committee** plans the ANPA Annual Meeting.

**The Website Committee** The ANPA website is located at [www.anpaonline.org](http://www.anpaonline.org).

### JOIN ANPA NOW!

**You can now join online at: [www.anpaonline.org](http://www.anpaonline.org)**

Candidates should have an interest in the field of clinical neuroscience.

Dues: \$175 regular membership \$70 members in training

#### **More information**

Mail: ANPA, 700 Ackerman Rd., Ste 625, Columbus, OH 43202

Website: [www.anpaonline.org](http://www.anpaonline.org)

Email: [anpa@osu.edu](mailto:anpa@osu.edu)

Phone: 614-447-2077

Fax: 614-263-4366

# American Neuropsychiatric Association

19th Annual Meeting — Earn up to 24.75 CME Credits for Physicians Or 24.75 CE Credits for Psychologists

## Savannah, Georgia

## March 1-4, 2008

### Jointly Sponsored by:

The Ohio State University Medical Center and the American Neuropsychiatric Association

With special participation of: The Society for Behavioral and Cognitive Neurology and The International Neuropsychological Society

### Savannah Marriott Riverfront

The Savannah Marriott Riverfront overlooks the Savannah River and offers easy access to shopping, dining and nightlife.

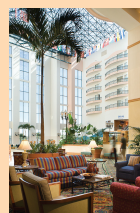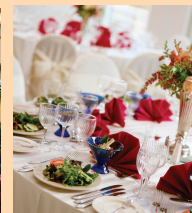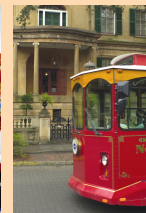

## Meeting Schedule

### Sunday, March 2, 2008

CNPA - Peter Basso Lecture

#### *The Ethical Brain*

**Michael S. Gazzaniga, Ph.D.**, Director,  
Sage Center for the Study of Mind  
University of California, Santa Barbara

*Interactive Sessions on Neuropsychiatric Syndromes:  
Seizure Disorders, Movement Disorders, Dementias,  
and Neuro-immunological Disorders.*

### Monday, March 3, 2008

*\*Emotional Dysregulation*

**Josef Parvizi, M.D., Ph.D.**

#### **Presidential Symposium**

*How the Brain Works: Large-Scale Models of Brain  
Structure and Function*

**Chair: Fred Ovsiew, M.D.**

*\*The Quest for the Basic Wiring Diagram of the Brain*  
**Larry W. Swanson, Ph.D.**

*\*Modules, Genes and Evolution: Lessons from  
Developmental Disorders*

**Michael Thomas, D.Phil**

*Exploring the Connected Brain: Using Functional Brain  
Imaging to Investigate Human Brain Networks*

**Barry Horwitz, Ph.D.**

**Lunch and Small Group Discussions**

**Case Vignettes**

**Posters and Concurrent Hot Topics and  
Platform Presentations**

### Tuesday, March 4, 2008

*Aging Begins at Conception - Part I: Neurobiology*

**Chair: Dilip V. Jeste, M.D.**

*Therapeutic and Research Potential of Human Stem Cells*

**Stephen L. Minger, Ph.D.**

*Genetics of Exceptional Longevity*

**Nir Barzilai, M.D.**

*The Healthy Aging Brain: Sustaining Attachment and Attaining Wisdom*

**Louis John Cozolino, Ph.D.**

*Aging Begins at Conception - Part II: Environmental Influences*

**Chair: Dilip V. Jeste, M.D.**

*\*Successful Cognitive and Emotional Aging*

**Dilip V. Jeste, M.D.**

*Maturational Shifts in Autonomic Regulation: Implications for Trauma  
Vulnerability and Treatment*

**Stephen W. Porges, Ph.D.**

*Viral Exposures with Delayed or Chronic Effects*

**Joseph R. Berger, M.D.**

**Panel discussion**

**ANPA 20th Anniversary Presentations**

*ANPA and the Recent History of American Neuropsychiatry*

**Randolph B. Schiffer, M.D.**

*Neuropsychiatric Empathy*

**Barry S. Fogel, M.D.**

*\*Indicates sessions that may be of particular interest to individuals  
seeking subspecialty certification in Behavioral Neurology and  
Neuropsychiatry.*

## Pre-Meeting Workshops

### Saturday, March 1, 2008

*\*Fundamentals in Genetics, Neuroimaging  
and Trauma to the Brain.*

**Chair: Robin A. Hurley, M.D.**  
**Allison Ashley-Koch, Ph.D.**  
**Thomas W. McAllister, M.D.**  
**Robin A. Hurley, M.D.**  
**Katherine H. Taber, Ph.D.**

*Society for Behavioral and  
Cognitive Neurology Workshop*

*Pain Hurts: Who, Where, and How*

**Chair: Daniel I. Kaufer, M.D.**

*Overview and Case Presentation*

**Daniel I. Kaufer, M.D.**

*\*Structural and Functional  
Neuroanatomy of Pain*

**Robin A. Hurley, M.D.**  
**Katherine H. Taber, Ph.D.**

*Neural Mechanisms Supporting the  
Construction of a Subjective Experience  
of Pain*

**Robert C. Coghill, Ph.D.**

If you have any questions about the meeting or for general information, please contact Sandy Bornstein at [ANPA@OSU.edu](mailto:ANPA@OSU.edu)

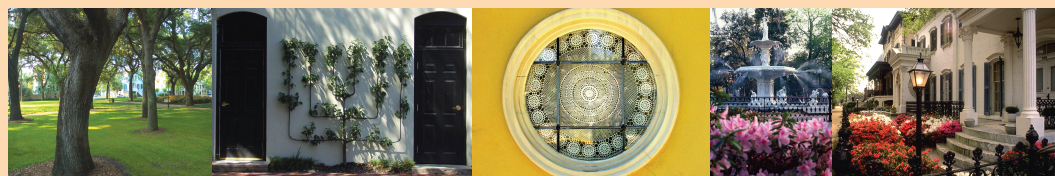

Phone: 614-447-2077

Fax: 614-263-4366

E-mail: [anpa@osu.edu](mailto:anpa@osu.edu)

700 Ackerman Rd., Suite 625

Columbus Ohio 43202

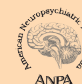

Meeting Details and Online Registration Available at: [www.anpaonline.org](http://www.anpaonline.org)
