# THE JOURNAL OF NEUROPSYCHIATRY and Clinical Neurosciences

The Official Journal of the American Neuropsychiatric Association

## In this issue:

- Electroencephalographic Cerebral Dysrhythmic Abnormalities in the Trinity of Nonepileptic General Population, Neuropsychiatric, and Neurobehavioral Disorders
- Multiple Sclerosis, Cannabinoids, and Cognition
- Nondysphoric Depression Following Stroke
- Traumatic Brain Injury, Apolipoprotein E- $\epsilon$ 4 and Cognition in Older Adults: A Two-Year Longitudinal Study
- Correlation between Denial of Illness and Executive Function Following Stroke: A Pilot Study

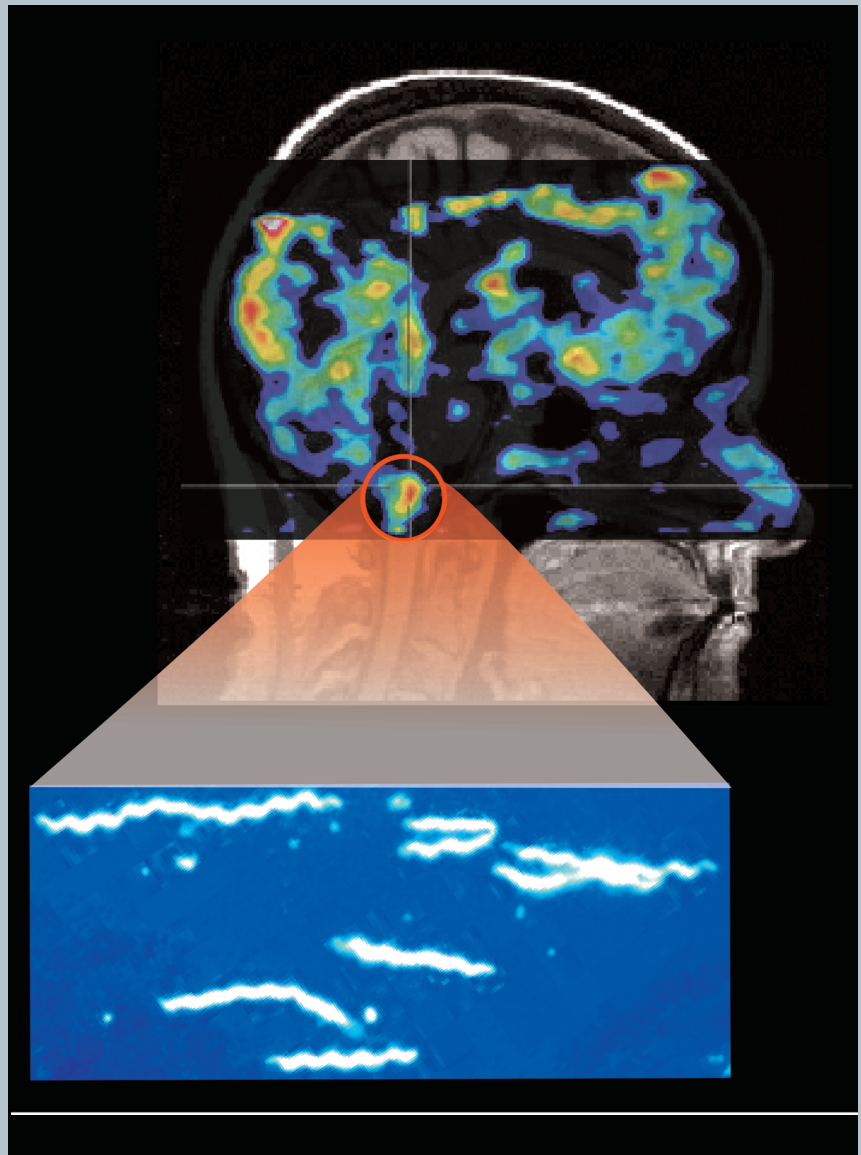

Source: https://psychiatryonline.org/doi/suppl/10.1176/jnp.2008.20.issue-1/suppl_file/cover.pdf
