The United Council for Neurologic SubsPECIALTIES (UCNS) will be offering the third certification examination in Behavioral Neurology & Neuropsychiatry (BN&NP). The certification examination will be held on **November 10-14, 2008**. The deadline to apply for the examination is **May 15, 2008**.

The certification examination will last for 4 hours and will consist of 200 computerized multiple choice questions. Pearson VUE will administer the examination at Pearson Professional Centers across the United States. Candidates will have the option of choosing one of the five days to sit for the examination and will be able to select a location to minimize travel, if necessary.

For more information regarding BN&NP Certification, the application process, and corresponding fees, please visit our website at [www.ucns.org/certification](http://www.ucns.org/certification) or contact Todd A. Bulson, UCNS Certification Manager, at (651) 695-2813; [tbulson@ucns.org](mailto:tbulson@ucns.org) (e-mail).

The 2007 BN&NP certification examination was held October 8-12, 2007. The diplomates list from the 2006 and 2007 certification examinations is posted at <http://ucns.org/certification/diplomates>. Congratulations to the following recently certified diplomates from the 2007 UCNS BN & NP Certification Examination.

|                                             |                                              |                                            |
|---------------------------------------------|----------------------------------------------|--------------------------------------------|
| John C. Adair, MD, Albuquerque, NM          | Robert P. Granacher, MD, MBA, Lexington, KY  | Bobby A. Miller II, MD, Huntington, WV     |
| Yahya H. Allahham, MD, Danville, KY         | Mark S. Groves, MD, Brooklyn, NY             | Majid Molaie, MD, FAAN, San Pedro, CA      |
| Loren I. Alving, MD, Fresno, CA             | Richard C. Haaser, MD, Bristol, TN           | Herman W. Moreno, MD, New York, NY         |
| Safwat Attia, MD, Buckhannon, WV            | Colin J. Harrington, MD, Barrington, RI      | Mohan S. Nair, MD, Seal Beach, CA          |
| Sheldon Benjamin, MD, Worcester, MA         | William B. Head, MD, Staten Island, NY       | Kurt A. Olson, M.D., J.D, Albuquerque, NM  |
| Colleen A. Blanchfield, MD, Oakton, VA      | Craig Hou, MD, San Francisco, CA             | Laura L. Pedelty, PhD, MD, Chicago, IL     |
| Amer M. Burhan, MBChB, London, ON           | Robin A. Hurley, MD, Salisbury, NC           | Gregory H. Pelton, M.D., New York, NY      |
| David G. Clark, MD, Homewood, AL            | Sajid Hussain, MD, Escanaba, MI              | John M. Ringman, MD, Los Angeles, CA       |
| John M. Coyle, MD, Atascadero, CA           | Seema Hussain, MD, Calgary, AB               | Max C. Rudansky, MD, Huntington, NY        |
| Ricardo K. Espailat, MD, Coral Springs, FL  | Nancy B. Isenberg, MD MPH, Highland Park, NJ | Ronald L. Schwartz, MD, Hattiesburg, MS    |
| Donald L. Freidenberg, DO,                  | Fazal M. Khan, MD, Okemos, MI                | Robert M. Stowe, MD, Vancouver, BC         |
| Upper Arlington, OH                         | Marilyn F. Kraus, MD, Associate Prof,        | Kaloyan S. Tanev, MD, Canton, CT           |
| Ellen C. Gaughan, MD, Plattsburgh, NY       | Chicago, IL                                  | Paul W. Tisher, MD, Bangor, ME             |
| Yonas E. Geda, MD, Rochester, MN            | Patricia A. Lowrimore, MD, Dallas, TX        | Juan Carlos, Urizar, MD, Newton Center, MA |
| Hirekatur V. Gopinath, MD, Pitt Meadows, BC | Karen S. Marder, MD, Bronx, NY               | Efim M.D. Weinman, MD, Baltimore, MD       |

The UCNS has also accredited 17 Behavioral Neurology & Neuropsychiatry fellowship programs as noted below. More details about the accredited fellowship programs can be found on our website at <http://ucns.org/apps/directory>.

Baylor College of Medicine  
Brigham and Women's Hospital  
Columbia University College of Physicians & Surgeons  
Dartmouth Medical School  
Emory University Hospitals  
Mayo Clinic (Rochester, MN)  
Mayo Clinic College of Medicine (Jacksonville, FL)  
McLean Hospital  
Northwestern University

The Johns Hopkins Hospital  
The University of Illinois at Chicago  
UCSF Memory and Aging Center  
University of Florida College of Medicine  
University of Arizona College of Medicine  
University of Colorado School of Medicine  
University of Massachusetts Medical School  
VA of Greater Los Angeles Healthcare System; UCLA  
Academic Affiliate
